# Supplementary material
Source: PubMed Central journal article supplement (PMC7022362)
Supplement: JVI.01387-19-s0001.pdf [file JVI.01387-19-s0001.pdf]

**Molecular basis of binding between MERS-CoV and CD26s from 7  
bat species**

**Supporting Information includes**

**Tables S1**

**Figures S1-S3**

**References for SI reference citations**

**Table S1. Comparison of MERS-RBD binding to MD bCD26 and hCD26**

| Residues in MD<br>bCD26/hCD26 | MD bCD26/MERS-RBD                                                      | hCD26/MERS-RBD                                                                  |
|-------------------------------|------------------------------------------------------------------------|---------------------------------------------------------------------------------|
| —/T188                        | —                                                                      | E536 (1)                                                                        |
| N227/N229                     | NAG: W535 (4), E536 (16),<br>NAG: W535 (22), D539 (2)<br>BMA: W535 (5) | NAG: W535 (3), E536 (13), D539 (1)<br>NAG: W535 (23), D539 (2)<br>BMA: W535 (6) |
| —/T265                        | —                                                                      | Y540 (3)                                                                        |
| —/V266                        | —                                                                      | Y540 (1)                                                                        |
| K265/K267                     | D537 (3), G538 (5), D539 (2)                                           | E536 (3), D537 (5), G538 (12), D539 (7)                                         |
| Y267/F269                     | D537 (6)                                                               | D537 (5)                                                                        |
| E278/T283                     | V561 (1)                                                               | —                                                                               |
| Q281/Q286                     | N501 (2), G538 (4), S557 (2), G558 (1), S559 (1)                       | N501 (4), D537 (1), G538 (11), S557 (3), G558 (1), S559 (1)                     |
| V283/T288                     | N501 (1), K502 (3), S557 (6)                                           | N501 (4), K502 (10), S557 (4)                                                   |
| A284/A289                     | K502 (4)                                                               | K502 (5)                                                                        |
| P285/P290                     | K502 (4), E513 (3)                                                     | K502 (3), E513 (3)                                                              |
| A286/A291                     | K502 (3), S504 (2), L506 (1), E513 (10), V555 (6)                      | K502 (2), S504 (1), L506 (4), E513 (11), V555 (4)                               |
| S287/S292                     | L506 (9), D510 (2), R511 (1)                                           | L506 (7), D510 (1)                                                              |
| L289/L294                     | Y540 (11), Y541 (1), R542 (4), V555 (6)                                | K502 (2), Y540 (7), R542 (8), V555 (4)                                          |
| T290/I295                     | L506 (1), R542 (15), W553 (27), V555 (1)                               | L506 (3), D510 (3), R542 (12), W553 (28), V555 (2)                              |
| G291/G296                     | Y540 (9), R542 (9)                                                     | R542 (7)                                                                        |
| D292/D297                     | Y540 (3)                                                               | R542 (1)                                                                        |
| H293/H298                     | Y540 (7)                                                               | Y540 (7)                                                                        |
| R312/R317                     | L506 (1), D510 (10)                                                    | L506 (1), D510 (11)                                                             |
| Y317/Y322                     | D510 (10), R511 (4)                                                    | D510 (4), R511 (4)                                                              |
| T329/S334                     | S460 (1),                                                              | S454 (1), D455 (1)                                                              |
| K331/R336                     | A461 (3), P463 (1), Q466 (2)                                           | M452 (1), D455 (8), P463 (9), Y499 (10)                                         |
| V336/V341                     | E513 (11), P515 (1)                                                    | E513 (9), P515 (2)                                                              |
| Q339/Q344                     | R511 (1), E513 (5)                                                     | E513 (5)                                                                        |
| I341/I346                     | R511 (7)                                                               | R511 (11)                                                                       |
| —/K392                        | —                                                                      | R511 (2)                                                                        |
| <b>Total contacts</b>         | 282                                                                    | 328                                                                             |

The number in the parentheses represent the number of van der Waals contacts, which the indicated residues conferred. The number in red suggest the potential H-bond between the pair of residues. In this table, van der Waals contact was analyzed at the

cutoff of 4.5 Å and the H-bonds at the cutoff of 3.3 Å.

## **Supplemental figures and figure legends**

**Pteropoda**

**Rhinolophidae**

**Hipposideridae**

**Emballonuridae**

**Phyllostomidae**

**Miniopteridae**

**Vesperturnidae**

|                  |                  |                       |                        |                    |                  |                         |                   |                   |                     |                        |                       |                         |                    |                      |                  |                        |                     |                  |                    |
|------------------|------------------|-----------------------|------------------------|--------------------|------------------|-------------------------|-------------------|-------------------|---------------------|------------------------|-----------------------|-------------------------|--------------------|----------------------|------------------|------------------------|---------------------|------------------|--------------------|
| <i>H. sopien</i> | <i>H. sopien</i> | <i>R. oegyphiacus</i> | <i>E. buettikoferi</i> | <i>P. vampyrus</i> | <i>P. alecto</i> | <i>R. ferrumequinum</i> | <i>R. sinicus</i> | <i>H. amniger</i> | <i>S. bilineata</i> | <i>A. planirostris</i> | <i>A. jamaicensis</i> | <i>C. perspicillata</i> | <i>D. rotundus</i> | <i>M. natalensis</i> | <i>E. fuscus</i> | <i>P. pipistrellus</i> | <i>M. lucifugus</i> | <i>M. dardii</i> | <i>M. brandtii</i> |
| 100/100          | 88.73/83.94      | 88.60/82.48           | 88.20/81.75            | 88.83/82.48        | 86.09/81.75      | 86.50/81.75             | 84.89/81.62       | 85.56/82.48       | 84.51/81.75         | 84.38/81.02            | 83.99/81.75           | 84.78/83.21             | 83.99/81.75        | 84.74/83.70          | 82.37/78.83      | 83.60/80.29            | 82.52/76.64         | 83.71/80.29      |                    |
|                  | 100/100          | 96.46/94.16           | 94.63/92.70            | 94.88/91.24        | 87.40/84.67      | 88.73/86.13             | 87.91/84.56       | 86.86/81.02       | 85.70/80.29         | 85.83/81.02            | 84.78/79.56           | 85.56/79.56             | 84.91/81.02        | 86.18/82.22          | 83.03/77.37      | 84.78/78.10            | 83.37/75.91         | 84.63/79.56      |                    |
|                  |                  | 100/100               | 95.67/94.16            | 95.67/91.97        | 88.19/84.67      | 88.86/85.40             | 87.39/82.35       | 87.52/81.02       | 85.30/79.56         | 85.43/80.29            | 84.91/79.56           | 85.83/79.56             | 85.17/81.75        | 86.58/82.96          | 83.55/78.10      | 85.30/78.83            | 84.23/76.64         | 85.02/78.83      |                    |
|                  |                  |                       | 100/100                | 98.03/97.81        | 86.88/83.21      | 88.47/84.67             | 87.12/82.35       | 87.25/79.56       | 85.56/78.10         | 85.70/78.83            | 85.17/79.56           | 86.35/79.56             | 85.55/79.56        | 86.05/80.74          | 83.68/78.10      | 85.04/76.64            | 84.63/77.37         | 85.28/78.10      |                    |
|                  |                  |                       |                        | 100/100            | 86.99/81.75      | 88.58/83.21             | 87.65/81.62       | 87.50/79.56       | 86.20/78.83         | 86.39/79.56            | 85.41/82.48           | 86.73/78.83             | 85.55/78.83        | 86.56/80.00          | 84.19/77.37      | 85.41/75.91            | 84.34/76.64         | 85.39/77.37      |                    |
|                  |                  |                       |                        | 100/100            | 95.01/90.51      | 90.00/88.24             | 90.00/88.24       | 86.97/83.21       | 85.41/81.02         | 85.28/80.29            | 85.41/82.48           | 85.55/82.48             | 86.73/83.09        | 85.55/83.09          | 85.51/86.67      | 83.40/81.02            | 84.89/82.48         | 83.95/80.29      | 84.74/83.21        |
|                  |                  |                       |                        |                    | 100/100          | 100/100                 | 91.72/88.24       | 87.25/80.29       | 85.70/80.29         | 85.56/79.56            | 85.83/81.02           | 86.22/81.02             | 87.01/81.02        | 86.05/82.96          | 84.61/82.48      | 85.04/80.29            | 84.36/78.10         | 85.02/81.02      |                    |
|                  |                  |                       |                        |                    |                  |                         | 100/100           | 85.38/80.88       | 84.47/80.88         | 84.34/80.15            | 84.87/83.09           | 85.13/83.09             | 85.79/80.88        | 84.85/82.22          | 82.98/80.88      | 85.00/82.35            | 83.79/79.41         | 84.85/83.09      |                    |
|                  |                  |                       |                        |                    |                  |                         |                   | 100/100           | 85.28/79.56         | 99.87/99.27            | 94.12/89.78           | 93.20/88.78             | 85.19/79.56        | 85.22/81.48          | 83.25/78.10      | 84.08/81.02            | 82.61/76.64         | 83.39/80.29      |                    |
|                  |                  |                       |                        |                    |                  |                         |                   |                   | 100/100             | 99.87/99.27            | 94.12/89.78           | 93.20/88.78             | 85.19/81.75        | 84.21/80.74          | 83.42/76.64      | 83.86/78.83            | 82.39/74.45         | 83.97/80.83      |                    |
|                  |                  |                       |                        |                    |                  |                         |                   |                   |                     | 100/100                | 93.99/89.05           | 93.07/89.05             | 85.04/82.48        | 84.08/80.00          | 83.29/75.91      | 83.73/78.10            | 82.36/73.72         | 83.64/78.10      |                    |
|                  |                  |                       |                        |                    |                  |                         |                   |                   |                     |                        | 100/100               | 94.12/94.16             | 84.91/83.21        | 84.61/82.22          | 83.99/82.48      | 84.78/83.21            | 83.71/80.29         | 84.76/83.21      |                    |
|                  |                  |                       |                        |                    |                  |                         |                   |                   |                     |                        |                       | 100/100                 | 86.22/82.48        | 85.79/83.70          | 84.34/81.02      | 84.51/81.75            | 83.44/78.83         | 84.63/81.75      |                    |
|                  |                  |                       |                        |                    |                  |                         |                   |                   |                     |                        |                       |                         | 100/100            | 88.68/85.93          | 85.66/80.29      | 87.27/83.21            | 85.94/81.75         | 86.86/83.94      |                    |
|                  |                  |                       |                        |                    |                  |                         |                   |                   |                     |                        |                       |                         |                    | 100/100              | 93.80/88.89      | 93.68/91.85            | 92.62/88.15         | 93.41/91.85      |                    |
|                  |                  |                       |                        |                    |                  |                         |                   |                   |                     |                        |                       |                         |                    |                      | 100/100          | 90.79/86.86            | 90.25/86.13         | 90.65/87.59      |                    |
|                  |                  |                       |                        |                    |                  |                         |                   |                   |                     |                        |                       |                         |                    |                      |                  | 100/100                | 96.58/93.43         | 97.63/97.08      |                    |
|                  |                  |                       |                        |                    |                  |                         |                   |                   |                     |                        |                       |                         |                    |                      |                  |                        | 100/100             | 96.97/94.16      | 100/100            |

**Figure S1. Diversity of bCD26s and homologies to hCD26.** The percent identity matrix among bCD26s and hCD26 is displayed. In each pair of comparisons, the former number indicates the percent identity of the full-length CD26, and the latter number represents the percent identity of the region spanning blades IV and V. The family name of each species of bat is marked above the matrix and in the same color as the name of the species.

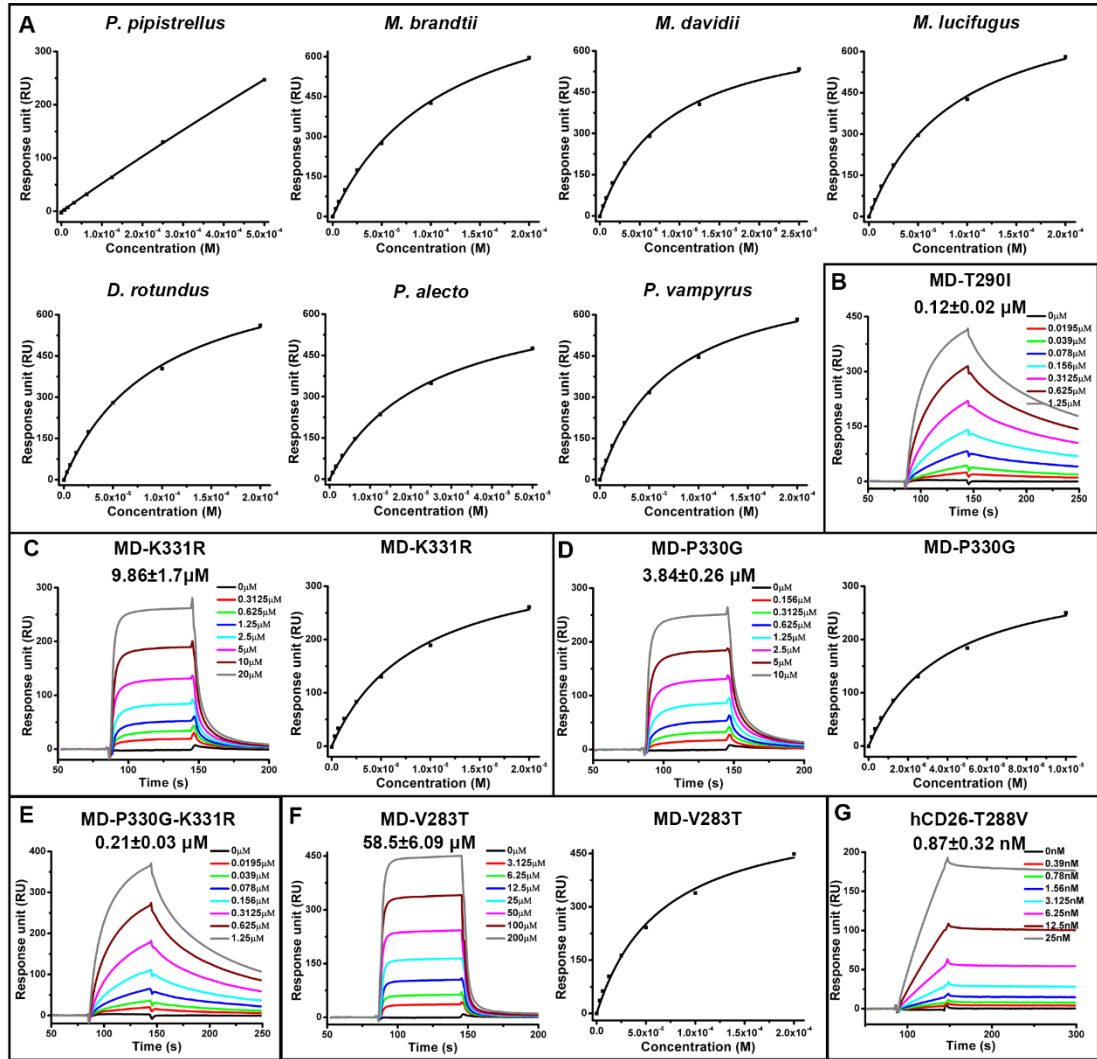

**Figure S2. The interactions between MERS-RBD and the indicated CD26s. (A)** The saturation profiles for the indicated binding pairs characterized in the SPR assay, which are related to Figure 1. (B-F) The interaction between MERS-RBD and MD CD26 and hCD26-T288V mutations. The upper panel indicates the binding profile, and the lower panel represents the saturation curves. (B) MD-T290I binding to MERS-RBD. (C) MD-K331R binding to MERS-RBD. (D) MD-P330G binding to MERS-RBD. (E) MD-P330G-K331R binding to MERS-RBD. (F) MD-V283T binding to MERS-RBD. (G) hCD26-T288V binding to MERS-RBD.

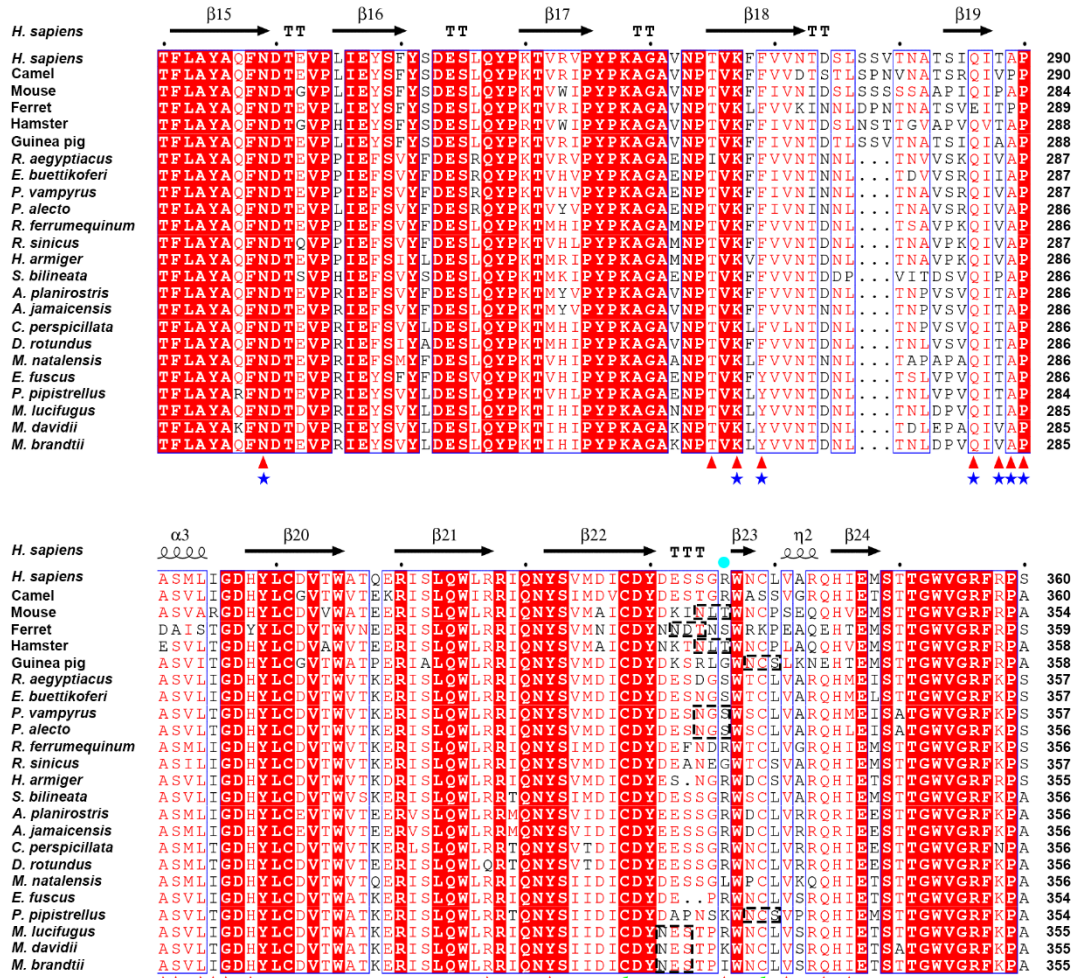

**Figure S3. Structure-based sequence alignment.** The secondary structure elements are defined based on an ESPrnt (1) algorithm and are labeled as in a previous report on the MERS-RBD structure (2). Spiral lines indicate  $\alpha$  or  $3_{10}$  helices, while arrows represent  $\beta$  strands. The Arabic numeral 1 indicates cysteine residues that pair to form disulfide bonds. The residues located within the distance of 4.0 Å in the interaction interface were analyzed and marked. The ones in hCD26 that bind MERS-RBD are highlighted with red triangles, and the MD bCD26 residues that bind MERS-RBD are indicated with blue stars. The cyan circle above the sequences indicates R336 in hCD26. Glycosylation motif around hCD26 R336 equivalents among species and bats are highlighted with dashed boxes.



## **References for SI reference citations**

1. Gouet P, Courcelle E, Stuart DI, Metoz F. 1999. ESPript: analysis of multiple sequence alignments in PostScript. *Bioinformatics* 15:305-308.
2. Lu G, Hu Y, Wang Q, Qi J, Gao F, Li Y, Zhang Y, Zhang W, Yuan Y, Bao J, Zhang B, Shi Y, Yan J, Gao GF. 2013. Molecular basis of binding between novel human coronavirus MERS-CoV and its receptor CD26. *Nature* 500:227-31.
